# Supplementary material for: Continuous process of cellulose dissolution and transesterification reaction catalysed by ionic liquid in twin screw extruder
Source: Royal Society of Chemistry journal article supplement (doi:10.1039/d2re00537a), 2023-01-01
Supplement: d2re00537a1.pdf [file d2re00537a1.pdf]

## Electronic supplementary information (ESI)

### Continuous process of cellulose dissolution and transesterification reaction catalysed by ionic liquid in twin screw extruder

Romain Milotskyi\*, Gyanendra Sharma, Tetsuo Fujie, Daisuke Hirose, Naoki Wada, Kenji Takahashi\*

*Institute of Science and Engineering, Kanazawa University, Kakuma machi, Kanazawa, 920 1192, Japan*

*E-mail : romain-mi@se.kanazawa-u.ac.jp ; ktkenji@staff.kanazawa-u.ac.jp*

This supplementary material contains:

Number of pages: 11

Number of figures: 11

Number of Tables: 2

Number of Schemes: 1

| <b>Content</b>       | <b>Page #</b> |
|----------------------|---------------|
| Figure ES1-ES11      | 2-8           |
| Table ES1, ES2       | 9             |
| Scheme ES1           | 10            |
| E-factor calculation | 11            |

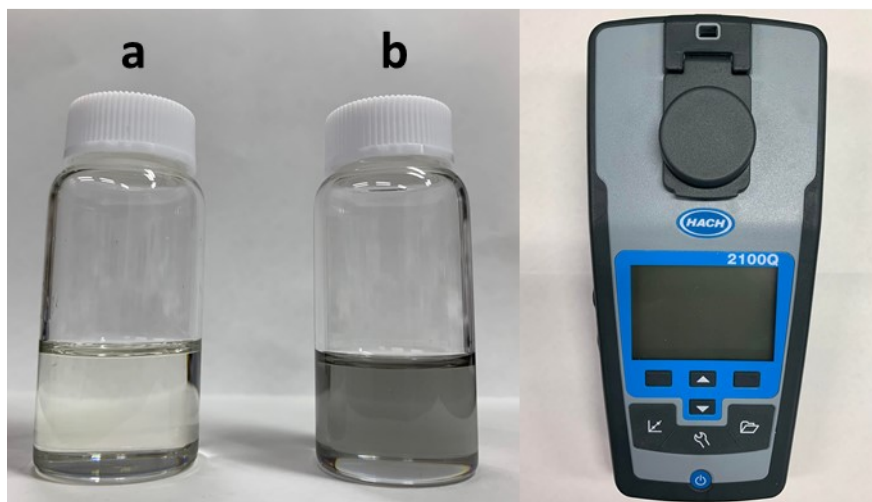

Fig. ES1 Turbidity measurement samples (a: without  $\text{Fe}_3\text{O}_4$ , b: with  $\text{Fe}_3\text{O}_4$ ) – (left), 2100Q Portable Turbidimeter equipment – (right).

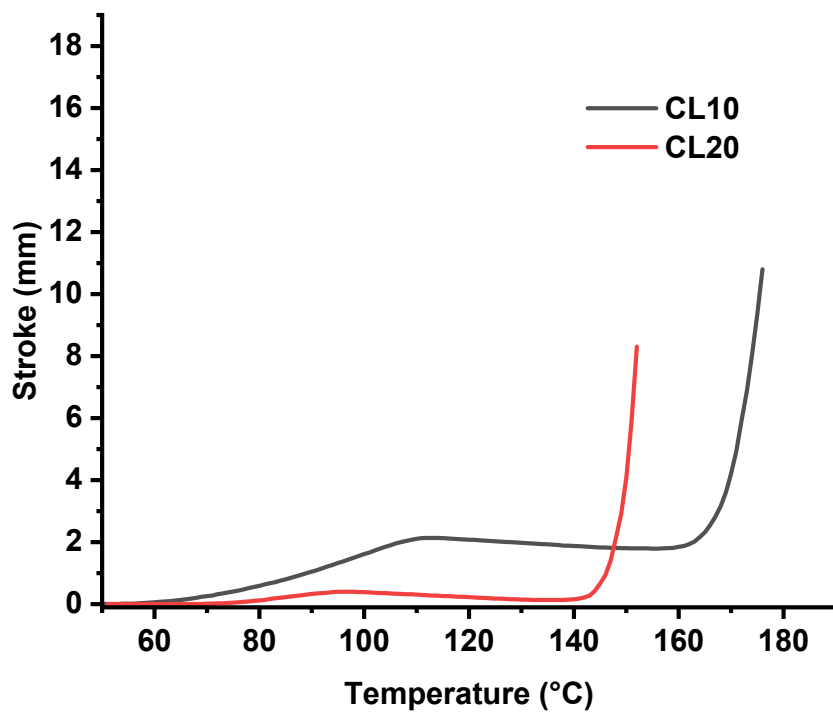

Fig. ES2 Stroke-temperature graph of cellulose laurate samples.

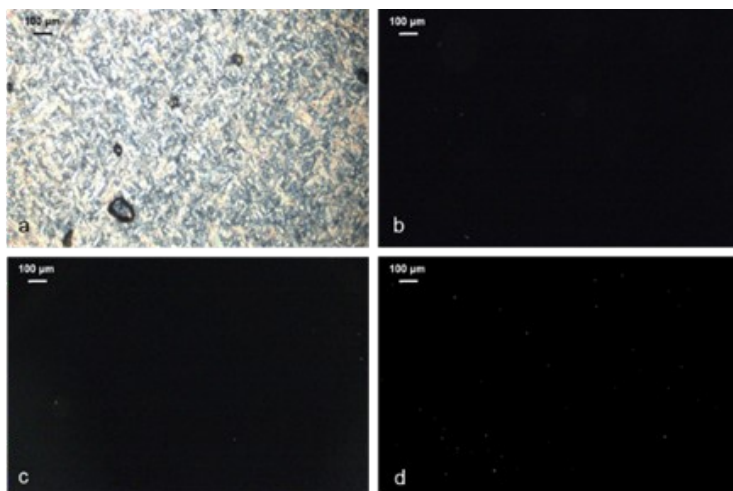

Fig. ES3 Optical microscopy images of MCC solution of different concentration in EmimOAc/DMSO (1/3 g/g) extruded at different temperatures ( $n = 60$  rpm,  $Q = 6$  g/min): (a) Conc = 20 wt%,  $T = 100$  °C; (b) Conc. = 10 wt%,  $T = 100$  °C; (c) Conc = 10 wt%,  $T = 80$  °C and (d) Conc = 10 wt%,  $T = 60$  °C.

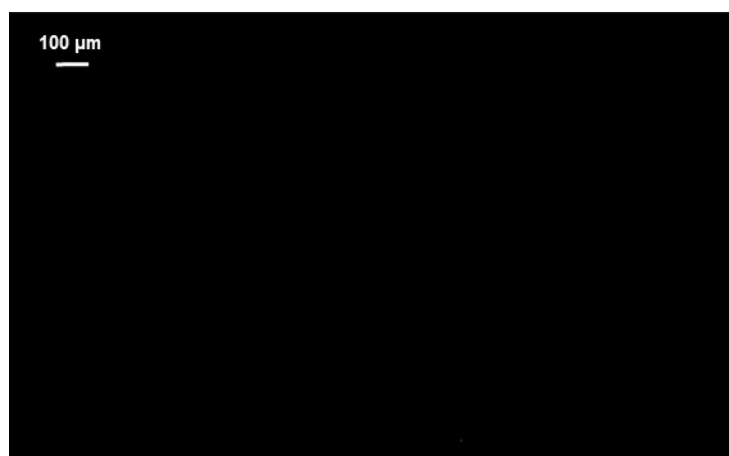

Fig. ES4 Optical microscopy images of MCC solution in EmimOAc/DMSO (1/3 g/g) extruded at feed rate of 30 g/min (Conc = 10 wt%,  $T = 80$  °C,  $N = 60$  rpm)

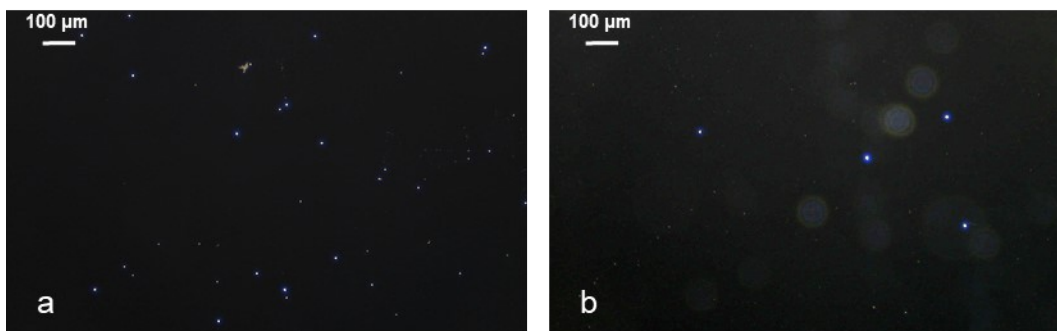

Fig. ES5 Optical microscopy images of MCC solution in EmimOAc/DMSO (1/3 g/g) extruded at different screw speed (Conc = 10 wt%, T = 80 °C): (a) N = 120 rpm; (b) N = 180 rpm.

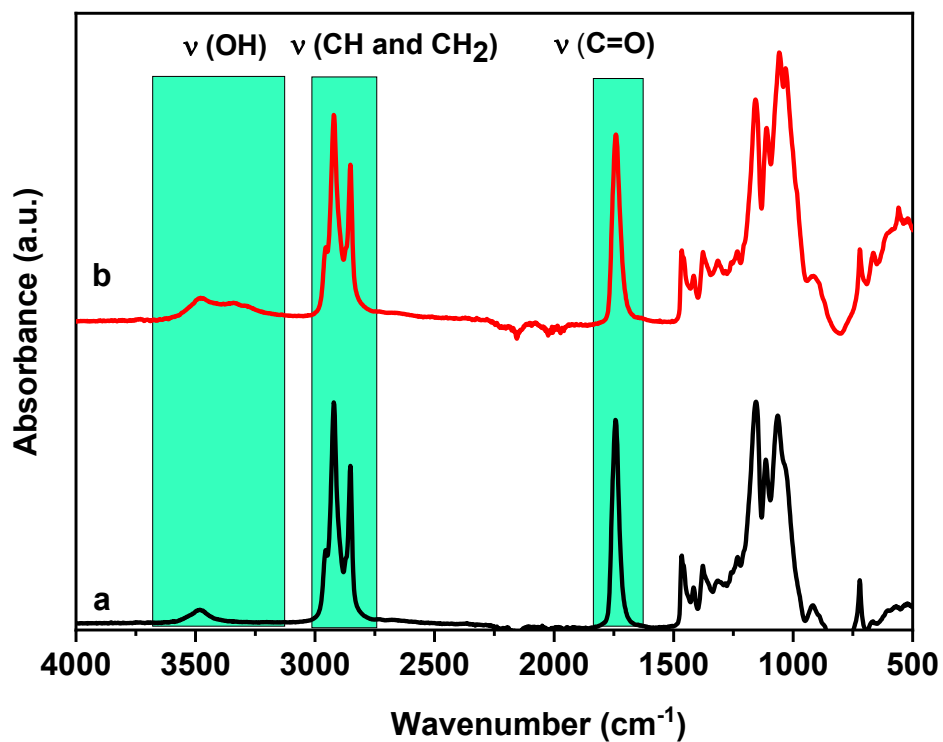

Fig. ES6 ATR-FTIR spectra of CL10 (a) and CL20 (b).

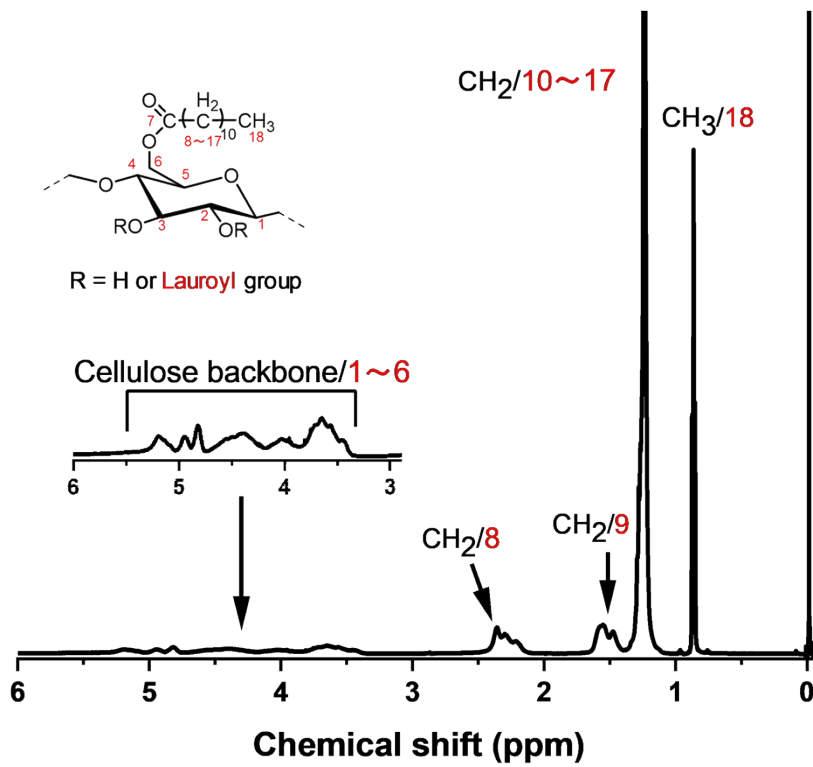

Fig. ES7  $^1\text{H}$  NMR spectrum of cellulose laurate (CL10) in  $\text{CDCl}_3$ .

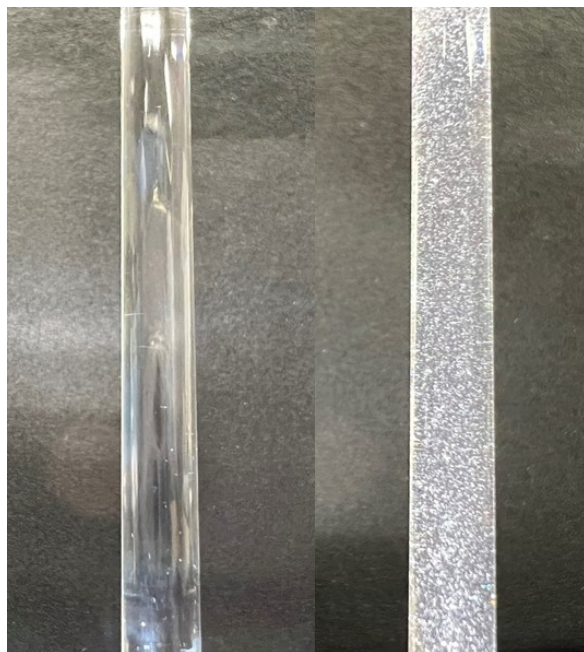

Fig. ES8 Cellulose laurate samples solubility in  $\text{CHCl}_3$  (concentration 10 g/L): CL10 (left) and CL20 (right)

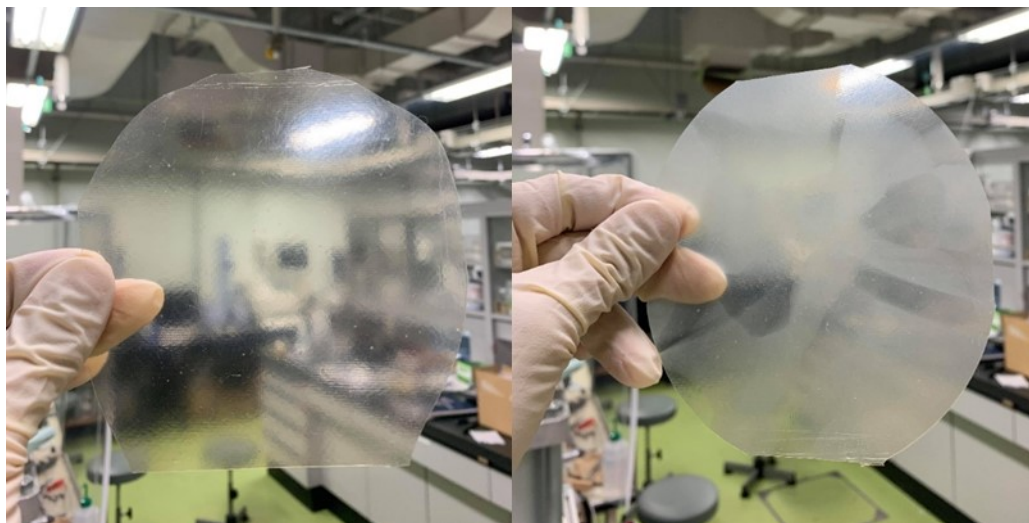

Fig. ES9 CL films prepared from CL10 (left) and CL20 (right)

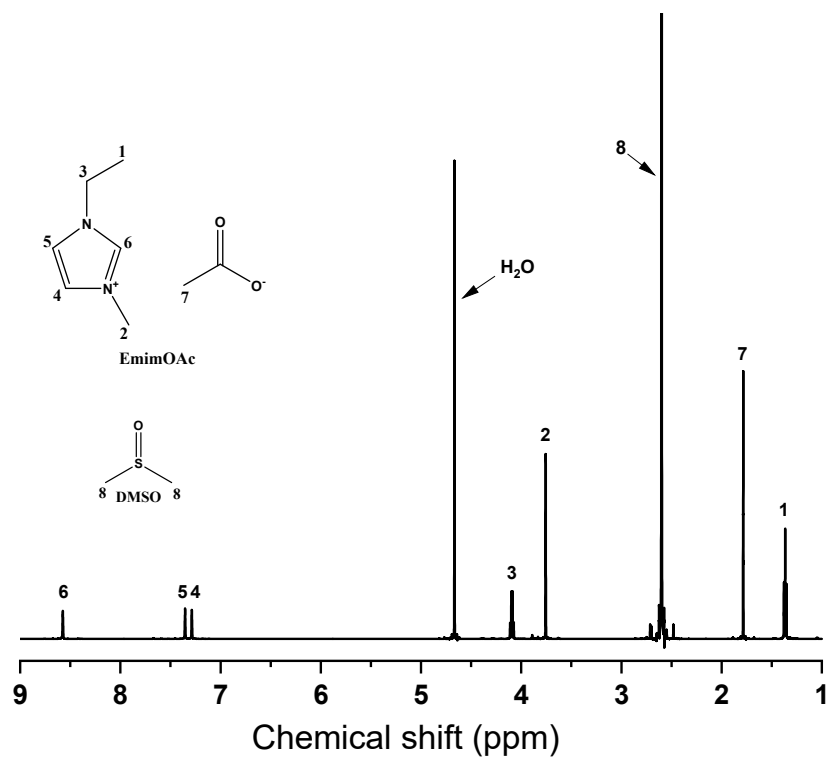

Fig. ES10  $^1\text{H}$  NMR spectra of fresh EmimOAc/DMSO (1/3 g/g) mixture in  $\text{D}_2\text{O}$

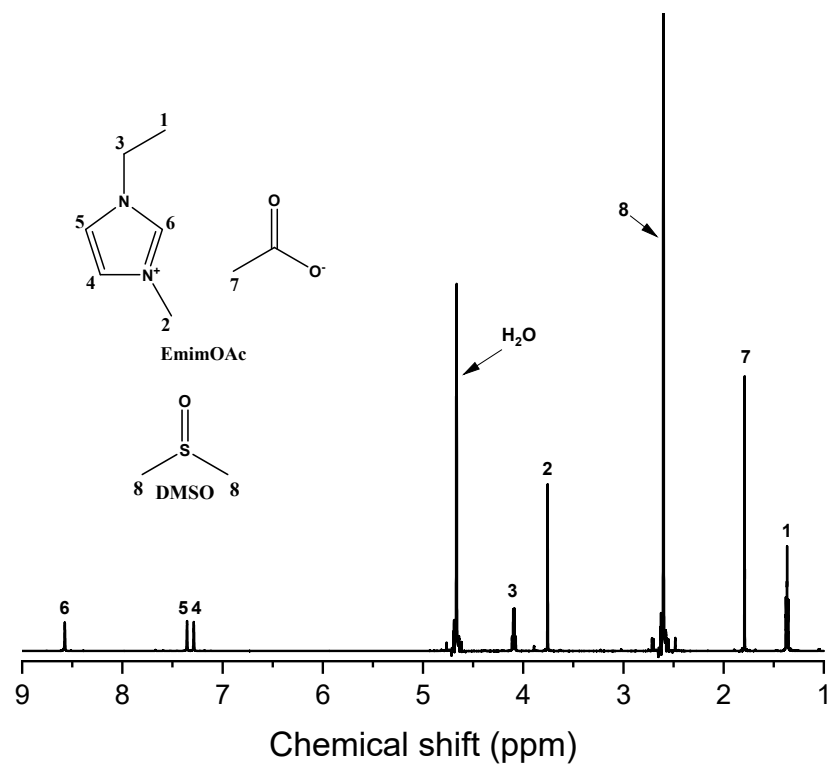

Fig. ES11  $^1\text{H}$  NMR spectra of recovered EmimOAc/DMSO (1/3 g/g) mixture in  $\text{D}_2\text{O}$



Table ES1

Experimental design for MCC dissolution and RTD measurements experiment

| Run | MCC conc<br>wt% | Feed rate<br>g/min | MCC<br>g/min | EmimOAc/DMSO<br>g/min |
|-----|-----------------|--------------------|--------------|-----------------------|
| 1   | 10              | 6                  | 0.60         | 5.40                  |
| 2   | 10              | 30                 | 3.00         | 27.00                 |
| 3   | 20              | 6                  | 1.20         | 4.80                  |
| 4   | 20              | 30                 | 6.00         | 24.00                 |

MCC dissolution conditions: EmimOAc/DMSO (1/3 g/g); 60 rpm; 80 °C.

Table ES2

Thermal properties of cellulose laurate samples of different DS

| Sample <sup>a</sup> | DS <sub>main</sub> | T <sub>d,10%</sub> (°C) | T <sub>s</sub> (°C) | T <sub>fb</sub> (°C) | T <sub>off</sub> (°C) |
|---------------------|--------------------|-------------------------|---------------------|----------------------|-----------------------|
| CL10                | 2.48 ± 0.05        | 364                     | 110.3               | 156.0                | 172.9                 |
| CL20                | 2.67 ± 0.04        | 375                     | 96.4                | 140.1                | 151.1                 |

<sup>a</sup> Reaction conditions: 10 wt% MCC (CL10) and 20 wt% of MCC (CL20) in EmimOAc/DMSO (1/3 g/g); vinyl laurate 3 eq./[AGU]; 60 rpm; 80 °C.

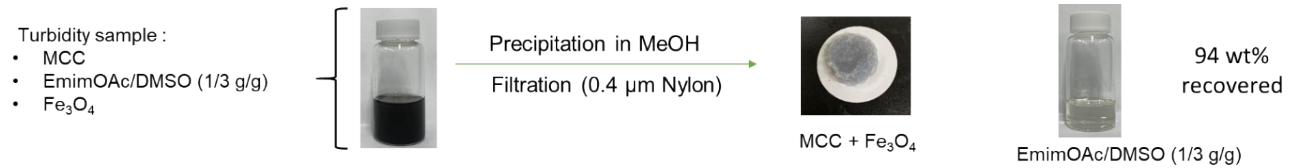

Scheme ES1: Recovery of EmimOAc/DMSO (1/3 g/g) mixture after turbidity measurements

## E-factor calculation

The E-factor was calculated using Equation 1 and the method described by (Onwukamike et al., 2019)<sup>1</sup>

## CL10 synthesis

Raw materials used in this study:

Since we used the continuous flow, we calculate the amount of each reaction component and product used in our process per minute of time. The weight of each component was:

Cellulose (MCC) = 3.00 g, EmimOAc = 6.75 g, DMSO = 20.25 g, Vinyl laurate = 12.57 g (3 eq/[AGU])

Total weight of raw materials = 42.57 g

Obtained DS: 2.48

Weight of obtained product = 9.43 g (yield 83%)

E factor = (Weight of raw materials - Weight of product) / Weight of product

E-factor =  $(42.57 - 9.43) / 9.43 = 3.5$

Equation 1: E-factor = (Weight of raw materials - Weight of product) / (Weight of product)

<sup>1</sup>K.N. Onwukamike, S. Grelier, E. Grau, H. Cramail, M. A. R. Meier, *ACS Sustain. Chem. Eng.*, 2019, 7, 1826–1840.
